# Supplementary material
Source: PubMed Central journal article supplement (PMC4610257)

Scans associated with Figure-4 (Harper)

Related to 4c

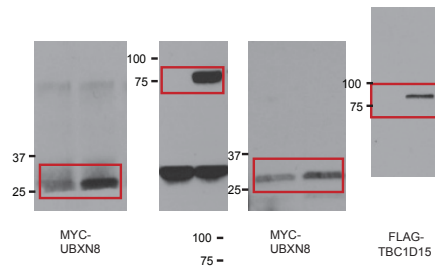

Related to 4d

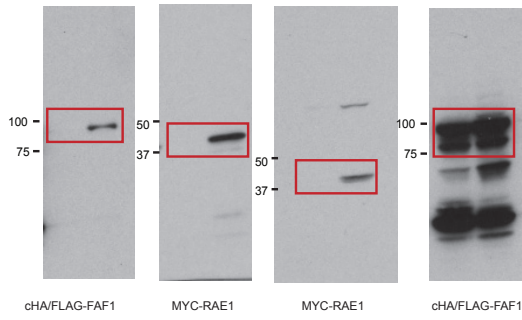

Related to 4e

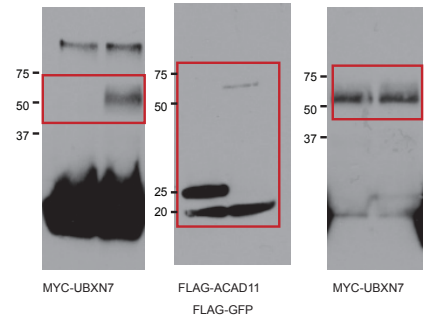

Related to 4f

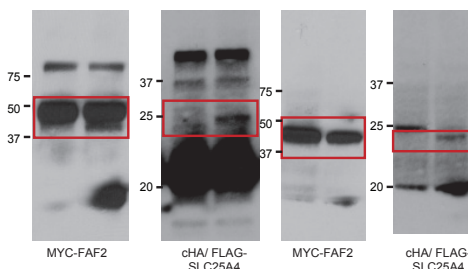

Related to 4g

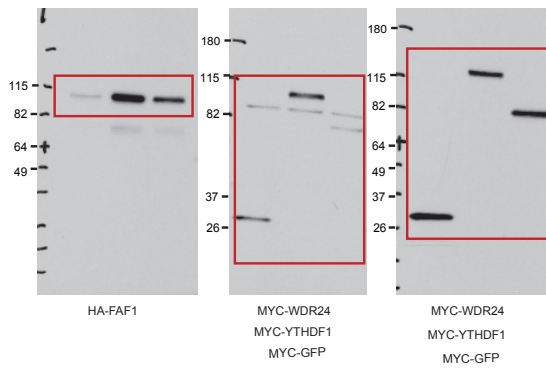

Related to 4h

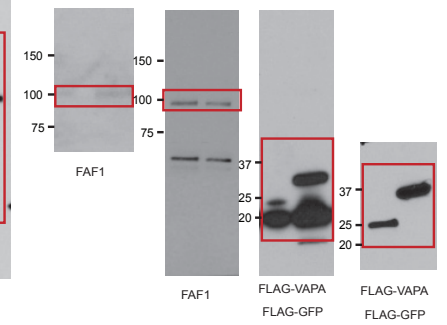

Related to 4i

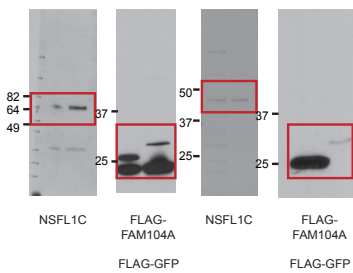

Related to 4j

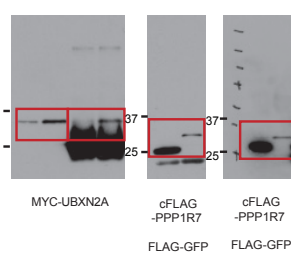

Related to 4k

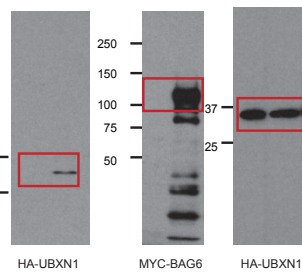

Related to 4l

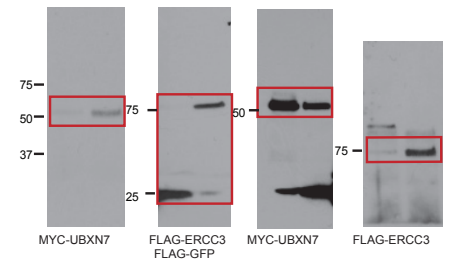

Related to 4m

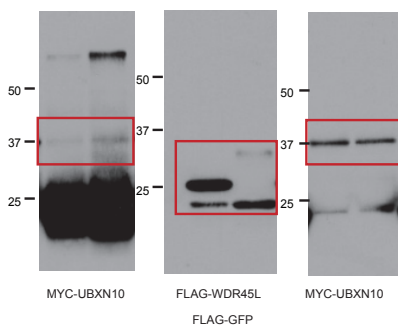

Related to 4n

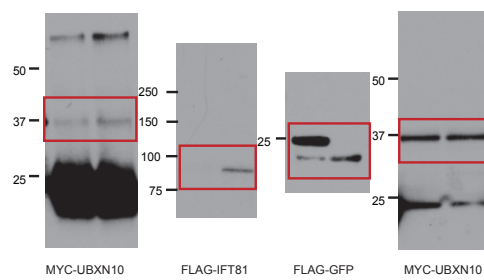

Related to 4o

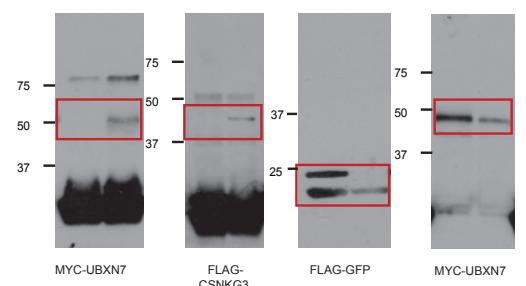



Scans associated with Figure-6 (Harper)

Related to 6e

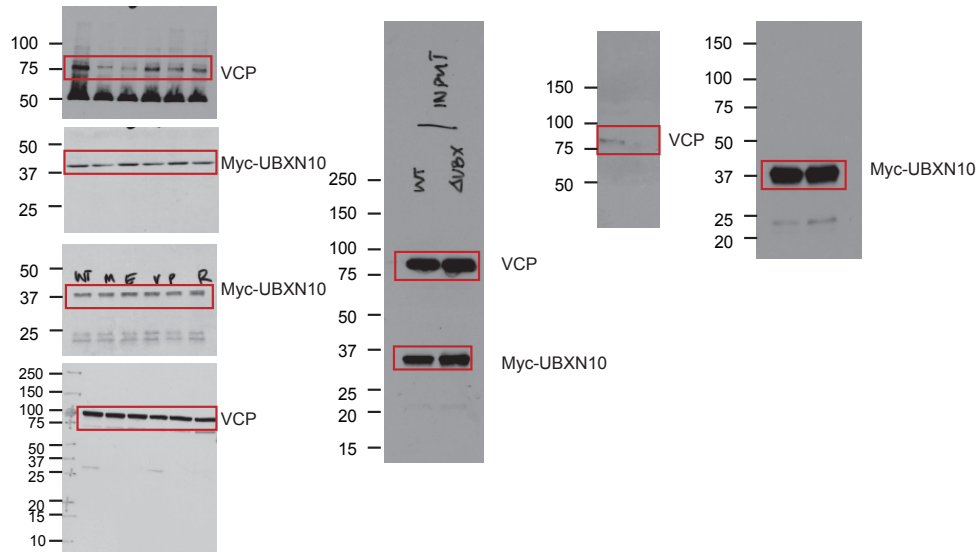

Related to 6f

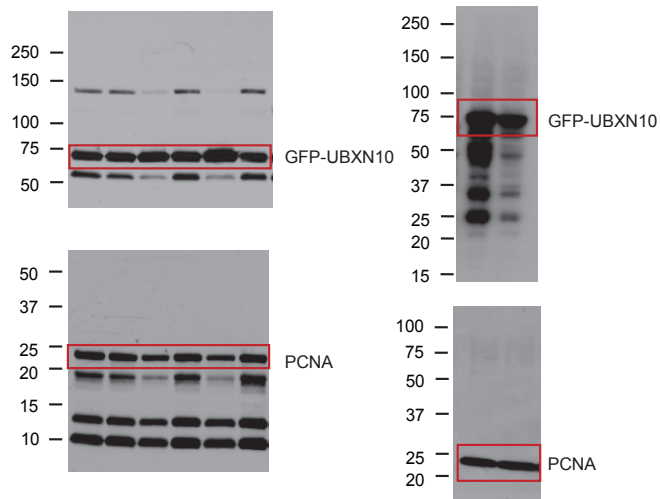

Scans associated with Figure-7 (Harper)

Related to 7a

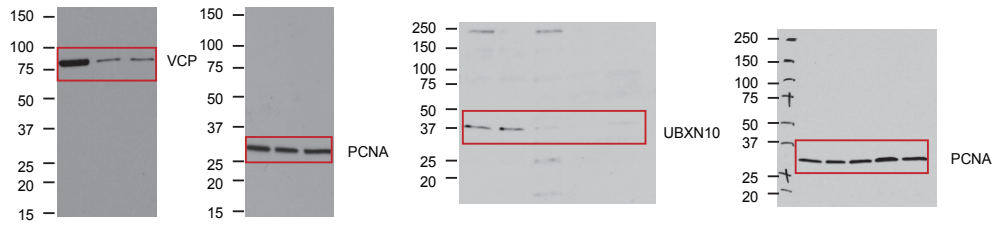

Related to 7c

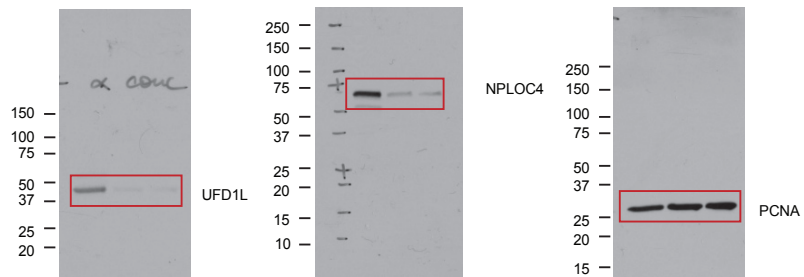

Related to 7d

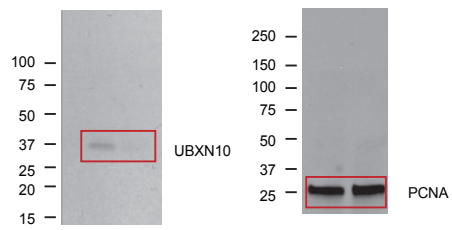

Scans associated with Figure-8 (Harper)

Related to 8g

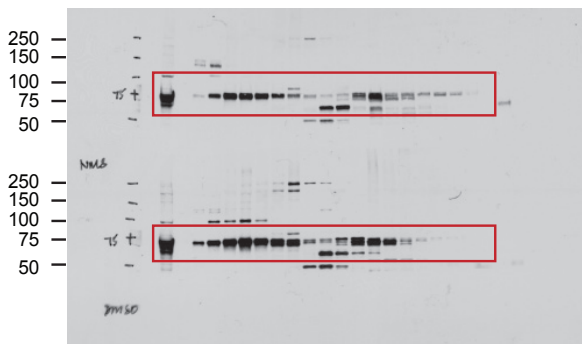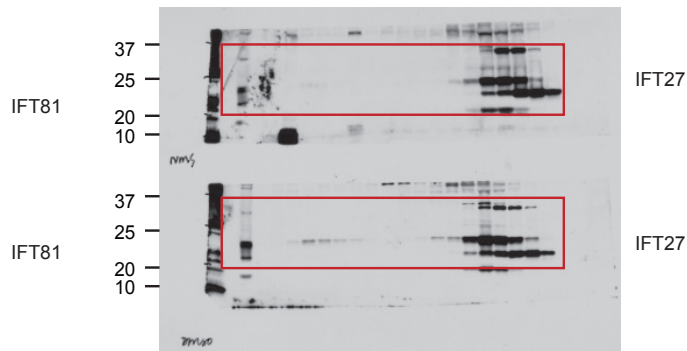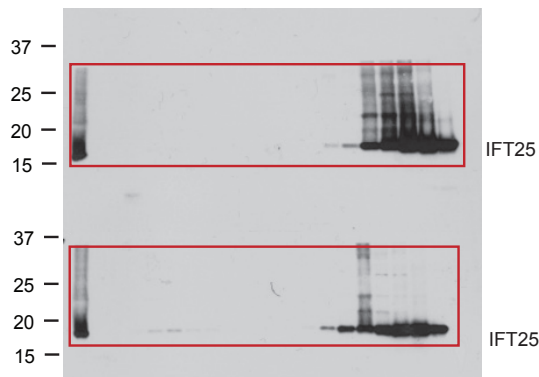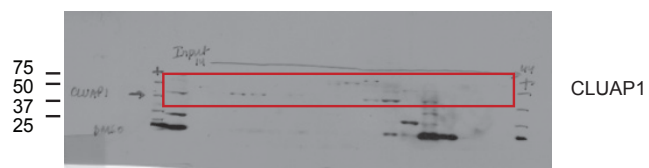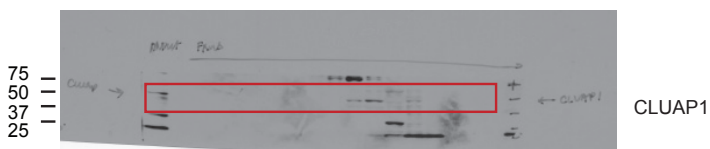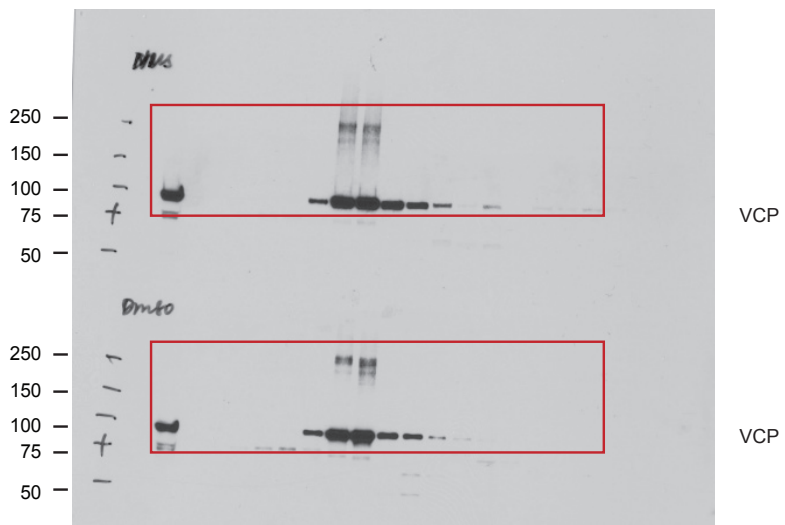

Supplement: NIHMS715871-supplement-9.pdf [file NIHMS715871-supplement-9.pdf]
